# Supplementary material
Source: Research Square preprint supplement (doi:10.21203/rs.3.rs-9329846/v1)
Supplement: Supplementary file 2 [file 76ca30914ca87385b7c2f4af.pdf]

邱立忠

長庚醫療財團法人林口/基隆長庚紀念醫院/土城醫院  
受試者同意書

一、計畫名稱：

胺基酸及生物胺代謝在急性呼吸窘迫症候群的前瞻性多中心研究及發展新的預後模型和治療

二、研究基本資料

病歷號碼：\_\_\_\_\_

1. 計畫編號：

IRB 案號/申請編號：

2. 試驗機構：林口長庚紀念醫院 基隆長庚紀念醫院 新北市立土城醫院

3. 執行者所屬單位：林口長庚紀念醫院 基隆長庚紀念醫院 新北市立土城醫院

4. 委託單位/廠商：無

5. 主持人：邱立忠

服務單位：長庚紀念醫院 胸腔內科

職稱：助理教授級主治醫師

電話：03-3281200 分機 8467

共同主持人：黃聰龍

服務單位：長庚大學 天然藥物研究所

職稱：教授

電話：03-2118800 轉 5523

共同主持人：鄭美玲

服務單位：長庚大學 生物醫學系

職稱：教授

電話：03-2118800 轉 3811

協同主持人：林恕民

服務單位：長庚紀念醫院 胸腔內科

職稱：副教授級主治醫師

電話：03-3281200 分機 8470

協同主持人：高國晉

服務單位：長庚紀念醫院 胸腔內科

職稱：教授級主治醫師

電話：03-3281200 分機 8467

協同主持人：鐘福財

服務單位：新北市立土城醫院 胸腔內科

職稱：副教授級主治醫師

電話：02-22630588 分機 6189

協同主持人：吳黃平

服務單位：長庚紀念醫院 胸腔內科

職稱：副教授級主治醫師

電話：02-24313131 分機 6260

受試者緊急聯絡電話：林口院區 邱立忠醫師 0975366109

基隆院區 吳黃平醫師 0975360627

新北市土城醫院 鍾福財醫師 0975368085

6. 受試者姓名：

受試者研究編號：

性別：

出生日期：

通訊地址：

聯絡電話：

三、簡介：

您好，我們敬邀您參加一個經由長庚醫院審核並通過關於胺基酸及生物胺代謝在急性呼吸窘迫症候群和加護病房病患的計畫。依衛生主管機關規定，您必須被告知接受檢驗及可能的風險。在您同意參加本研究之前，請您再次徹底閱讀這份受試者同意書，並且問清楚任何問題。您可自由決定是否參與本試驗，如果您不同意參加本試驗，您原有的權益亦不會受到任何影響。

四、研究目的：

急性呼吸窘迫症候群是一個血氧濃度低需要使用呼吸器來維持生命的症候群，死亡率接近五成，

人體試驗倫理委員會  
核准日期

110.5.28

長庚醫療財團法人

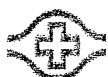

長庚醫療財團法人  
CHANG GUNG MEDICAL FOUNDATION

頁 1 之 6

版本日期

【2021/05/26 第三版】

多數病人的死因為多重器官衰竭。此症候群致病機轉複雜，除了呼吸器良好支持外，目前尚無藥物可以阻斷疾病進展和改善存活率。患者的氧化壓力高，會誘發一連串發炎反應，嗜中性白血球增加，細胞激素釋放，粒線體功能異常，造成更進一步的肺損傷和器官衰竭。胺基酸及生物胺異常代謝會造成進一步發炎反應，免疫系統活化，活性氧物質，氧化壓力增加及粒腺體功能異常。本研究主要目的是探討胺基酸及生物胺代謝，嗜中性白血球及相關發炎反應細胞，和相關細胞激素在急性呼吸窘迫症候群病患的表現與臨床預後的相關性。此計畫同時也會收集非急性呼吸窘迫症候群的加護病房病患及正常健康人，探討這些生物指標是否也會造成後續發展為急性呼吸窘迫症候群和影響預後死亡的危險因子，並和急性呼吸窘迫症候群病患比較相對應的生物和臨床指標。

#### 五、納入/排除條件：

一、如果您符合下列的納入/排除條件才有資格參與本試驗

##### 1. 納入標準

- (1) 年齡大於或等於 20 歲以上之成人
- (2) 符合下列其中一項者
  - a. 臨床上診斷為急性呼吸窘迫症候群的受試者 (實驗組)
  - b. 非急性呼吸窘迫症候群的加護病房受試者 (對照組)
  - c. 正常健康受試者(對照組)
- (3) 受試者本人或代理人簽署受試者同意書

##### 2. 排除條件

- (1) 懷孕
- (2) 後天免疫缺乏症候群
- (3) 末期癌症
- (4) 嚴重內科疾病患者併多重器官衰竭
- (5) 不願意簽署受試者同意書者

#### 六、試驗方法與程序說明：

本研究會於門診招募健康受試者、加護病房招募急性與非急性呼吸窘迫症候群受試者，健康受試者、急性與非急性呼吸窘迫症候群受試者或其法定代理人，經由醫師說明該計畫相關內容及注意事項，簽署同意書後，在急性呼吸窘迫症候群確診的第一天，第三天和第七天會採集受試者約 20 cc 血液檢體及約 10 cc 尿液檢體，確診第一天會施行支氣管鏡檢查取得肺泡沖洗液檢體。非急性呼吸窘迫症候群受試者，則於收案第一天，第三天和第七天會採集約 20 cc 血液檢體及約 10 cc 尿液檢體。和加護病房受試者年紀相符的正常健康人採集約 20 cc 血液檢體。以上檢體會進行胺基酸及生物胺相關代謝體分析，細胞實驗和細胞激素等分析。支氣管鏡檢查並非是急性呼吸窘迫症候群受試者必要之檢查，藉由支氣管鏡檢查取得肺泡沖洗液檢體，可以更加了解肺部相關生物指標和不明原因肺炎時致病菌或病毒之確認，對於診斷和治療會有所幫助。支氣管鏡檢查可能的併發症有呼吸道痙攣、咳血、氣胸、低血氧、發燒、菌血症、心律不整等，在加護病房做檢查，會有生命徵象監測儀持續監控，發生嚴重併發症的機會很低，若病人有發生危急生命的表徵出現時，我們會立即停止檢查。若受試者或法定代理人對於支氣管鏡檢查風險仍有所顧慮而不同意時，我們不會執行支氣管鏡檢查。

#### 七、可預期之風險、副作用、發生率及處理方法：

抽血可能的風險有血腫、皮下出血、靜脈炎等，我們會注意及觀察受試者在抽血過程後的反應，若有不適和相關的不良反應，我們會停止抽血的動作，並有醫護人員立即處置。本實驗為一觀察型研究，不干涉或是影響您的主治醫師臨床專業判斷或是醫療處置，對於正在治療的藥物和臨床處置。

試驗倫理委員會  
批准日期  
2021.05.28  
長庚醫療財團法人

並無影響。本計畫為評估受試者的胺基酸及生物胺相關代謝體分析，細胞實驗和細胞激素狀況，和基因不同，不會有個人隱私的問題。檢體在送檢編碼後，即會將個人資料去連結。本計畫會嚴守相關規定，防止相關個人隱私資料外洩。每次抽血將配合病患原定抽血時間，若於血液採檢時有發生嚴重副作用時，請通知緊急聯絡人。

八、其他可能之治療方式及說明：

**此研究為收集檢體，不影響例行常規的診斷與治療方式。**

九、本試驗之禁忌與限制，請您務必要充分配合之事項：

符合本計畫的研究對象病患需在計畫收案開始當天、第三天和第七天，接受靜脈抽血及尿液採檢。急性呼吸窘迫症候群病患在第一天需接受支氣管鏡檢查。

十、預期試驗效果：

您參加本研究未必會對您本人帶來好處，期望本研究利用胺基酸及生物胺相關代謝體分析，細胞實驗及細胞激素分析可以找出適當的生物指標，提供進一步致病機轉和藥物治療相關應用，對未來病人處置可能會有所助益。

十一、緊急狀況之處理：

若您參與本研究發生任何不適或其他緊急狀況，您可聯絡本計畫主持人邱立忠醫師，24小時緊急連絡電話為0975366109。

十二、補助、費用負擔與損害補償：

1.補助：無。

2.費用負擔：無。

3.損害補償：

(1)如依本研究所訂研究計畫，因而發生不良反應造成損害，由本院與試驗主持人依法負補償責任。但本受試者同意書上所記載之可預期不良反應，不予補償。

(2)如依本研究所訂研究計畫，因而發生不良反應或損害，本院願意提供專業醫療照顧及醫療諮詢。您不必負擔治療不良反應或傷害之必要醫療費用。

(3)除前二項補償及醫療照顧外，本研究不提供其他形式之補償。若您不願意接受這樣的風險，請勿參加試驗/研究。

(4)您不會因為簽署本同意書，而喪失在法律上的任何權利。

十三、保護隱私與機密性：

1.將會有一個研究代碼代表您的身分，此代碼不會顯示您的姓名、身分證字號、住址。

2.對於您訪查的結果及診斷，研究主持人將持保密的態度，小心維護您的隱私。如果發表研究結果，您的身分仍將保密。

3.請您亦瞭解若簽署同意書即同意您的訪查紀錄可直接受監測者、稽核者、研究倫理委員會及主管機關檢閱，以確保本研究過程與數據符合相關法律及法規要求。上述人員並承諾絕不違反您的身分之機密性。

4.請您瞭解基於安全考量，研究團隊可能會告知或聯繫您的其他科別主治醫師，使其了解您參與的試驗及疾病治療狀況，以避免藥物交互作用造成危害。

十四、試驗之退出與中止：

受試者或立同意書人有權在無任何理由情況下，隨時要求終止參與試驗，此將不會減損您的正當醫療權益與法律權利。試驗主持人或贊助廠商亦可能於必要時中止該試驗之進行。

十五、受試者權利：

1.對於您個人資料之蒐集、處理及利用，試驗機構/試驗主持人將依受試者同意書、臨床試驗相關法

人體試驗倫理委員會  
核准日期

110.5.28

長庚醫療財團法人

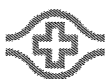

規及個人資料保護法相關規定辦理。您可以依據個人資料保護法之規定，以書面連絡試驗機構/試驗主持人而行使下列權利：

- (1)查詢或請求閱覽您的個人資料；
- (2)請求提供您個人資料的影印本；
- (3)請求補充或更正您的個人資料；
- (4)請求停止蒐集、處理或利用您的個人資料；
- (5)請求刪除您的個人資料。

2.研究過程中，凡可能影響您繼續接受臨床試驗意願的任何重大發現，都將及時提供給您。研究過程中如有任何的問題或狀況，請與主持人聯繫。

3.對身為受試者之權利有意見或懷疑因參與研究而受害時，可與本院之人體試驗倫理委員會聯絡請求諮詢，其電話號碼為：(03)319-6200 轉 3707、3703、3705~3709、3711~3714、3716~3717。

#### 十六、試驗成果及權益歸屬：

如本試驗計畫成果產生學術文獻發表、實質效益或衍生其他權益時，亦同意無償捐贈給本院作為疾病預防、診斷及治療等公益用途。

#### 十七、個人資料、檢體與檢體衍生物之保存與再利用：

檢體將存放於胸腔內科實驗室，邱立忠醫師為檢體保管負責人。若有剩餘檢體將於計畫結束後保存於胸腔內科實驗室一年，之後統一將檢體銷毀。

#### 十八、聲明：

1. 本計畫內容及同意書已經\_\_\_\_\_完整口頭告知及說明，受試者本人/法定代理人已充分瞭解並同意，本同意書一式二份，已將研究用受試者同意書之副本交給受試者。
2. 本研究計畫在加護病房收案，由法定代理人同意之受試者，若受試者可自行行使同意時，會補徵得其本人之同意。

A.受試者：\_\_\_\_\_ (正楷姓名)

\_\_\_\_\_ (簽名)

日期：\_\_\_\_年\_\_\_\_月\_\_\_\_日

B.取得同意書人：\_\_\_\_\_ (正楷姓名)

\_\_\_\_\_ (簽名)

日期：\_\_\_\_年\_\_\_\_月\_\_\_\_日

C.共/協同主持人：\_\_\_\_\_ (正楷姓名)

\_\_\_\_\_ (簽名)

日期：\_\_\_\_年\_\_\_\_月\_\_\_\_日

D.研究主持人：\_\_\_\_\_ (正楷姓名)

\_\_\_\_\_ (簽名)

日期：\_\_\_\_年\_\_\_\_月\_\_\_\_日

\*\*收案對象符合【同意書簽署說明】第(一)項時，此欄位必須簽名\*\*

|                   |
|-------------------|
| 人體試驗倫理委員會<br>核准日期 |
| 110.5.28          |
| 長庚醫療財團法人          |

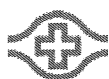

長庚醫療財團法人  
CHANG GUNG MEDICAL FOUNDATION

頁 4 之 6

版本日期

【2021/05/26 第三版】

E.法定代理人/有同意權人/監護人/輔助人：\_\_\_\_\_ (正楷姓名)

\_\_\_\_\_ (簽名) 日期：\_\_\_\_年\_\_\_\_月\_\_\_\_日

與受試者之關係：\_\_\_\_\_

**\*\*收案對象符合【同意書簽署說明】第(二)項時，此欄位必須簽名\*\***

F.見證人：\_\_\_\_\_ (正楷姓名)

\_\_\_\_\_ (簽名) 日期：\_\_\_\_年\_\_\_\_月\_\_\_\_日

**【同意書簽署說明】**

**(一)法定代理人/有同意權人/監護人/輔助人使用時機：**

\*醫療法 第 79 條/人體研究法 第 12 條/藥品優良臨床試驗準則 第五條：

- 1.受試者為無行為能力(未滿七歲之未成年人或受監護宣告之人)，由法定代理人為之；受監護宣告之人，由監護人擔任其法定代理人。
- 2.受試者為限制行為能力者(滿七歲以上之未成年人或受輔助宣告之人)，應得其本人及法定代理人或輔助人之同意。
- 3.受試者雖非無行為能力或限制行為能力者，但因意識混亂或有精神與智能障礙，而無法進行有效溝通和判斷時，由有同意權之人為之。

**(二)見證人使用時機：**

\*藥品優良臨床試驗準則 第二十一條：

- 1.受試者、法定代理人或有同意權人皆無法閱讀時，應由見證人在場參與所有有關受試者同意書之討論。見證人應閱讀受試者同意書及提供受試者之任何其他書面資料，以見證研究主持人或其指定之人員已經確切地將其內容向受試者、法定代理人或有同意權之人解釋，並確定其充分了解所有資料之內容。
- 2.受試者、法定代理人或有同意權人，仍應於受試者同意書親筆簽名並載明日期。但得以指印代替簽名。
- 3.見證人於完成口述說明，並確定受試者、法定代理人或有同意權人之同意完全出於其自由意願後，應於受試者同意書簽名並載明日期。
- 4.研究相關人員不得為見證人。

**(三)法定代理人簽署順序：**

\*依據醫療法第七十九條：醫療機構施行人體試驗時，應善盡醫療上必要之注意，並應先取得接受試驗者之書面同意；接受試驗者以有意思能力之成年人為限。但顯有益於特定人口群或特殊疾病罹患健康權益之試驗，不在此限。

\*依據人體試驗管理辦法 第五條：依據醫療法第七十九條第一項但書招募之成年或已結婚未成年之受試者，主持人應依下列順序取得其關係人至少一人之同意：

- 一、 配偶。
- 二、 父母。
- 三、 同居之成年子女。
- 四、 與受試者同居之祖父母。
- 五、 與受試者同居之兄弟姊妹。
- 六、 最近一年有同居事實之其他親屬。

前項第一款至第五款關係人之同意，以有同居事實者優先。

第一項關係人之同意，不得違反受試者曾表示之意思。

**【長庚醫療財團法人長庚紀念醫院/長庚大學/長庚科技大學 研究參與者需知】**

親愛的受試者、家屬、民眾，您好：

在您符合試驗或研究之納入條件時，您可能被邀請參與長庚醫院/長庚大學/長庚科技大學的研究計畫，為了保障您參與研究的安全與權益，以下內容將向您說明長庚醫療財團法人人體試驗倫理委員會所做的努力與把關，包含：

人體試驗倫理委員會  
核准日期

110.5.28

長庚醫療財團法人

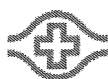

長庚醫療財團法人  
CHANG GUNG MEDICAL FOUNDATION

頁 5 之 6

版本日期

【2021/05/26 第三版】

計畫如何審查、審查的重點為何以及受試者的權利。

● **什麼是研究？**

「研究」和「治療」是不一樣的。「治療」是已經歷經研究過程，完全了解治療以後可能發生的結果及副作用的發生機率。但「研究」是為了解答我們原來所不知道的知識，並不完全清楚會發生怎樣的結果。因此，**研究不是一定要參加，且不參加不會影響您後續接受醫療照護的權益或者遭受任何不公平的待遇。**

● **什麼是人體試驗倫理委員會？**

「人體試驗倫理委員會(Institutional Review Board, 簡稱IRB)」是為確保人體試驗或研究符合科學與倫理適當性，所設立的審查單位。由具專業知識的醫療人員，及法律專家、社會公正人士或民間團體代表等非醫學背景人士組成，協助研究人員了解受試者的處境，以確保受試者的安全與權益。**受試者對參與研究之相關權益有任何問題時，都可向長庚醫療財團法人人體試驗倫理委員會詢問。**

● **人體試驗倫理委員會如何審查臨床試驗/研究計畫？審查的重點為何？**

- (1) 在長庚醫院/長庚大學/長庚科技大學執行的研究，都需要經過長庚醫療財團法人人體試驗倫理委員會的審查，通過了才可執行。
- (2) 送到人體試驗倫理委員會的研究計畫，都會經過委員或者專家，以獨立、專業且謹慎的態度進行審查，審查的重點，包含：是否有詳盡告知受試者試驗相關的事宜(包含：試驗目的、試驗進程序等)、其他可能替代的治療方式、參與研究的副作用、風險及好處、如何退出研究、參加者的照護與隱私是否受到保護等。
- (3) 在進行臨床研究審查時，長庚醫療財團法人人體試驗倫理委員會將評估這些研究計畫對於參與研究者可能造成的風險有哪些？有些風險是屬於身體上的疼痛、不適，有些則帶來心理上的不舒服，有些甚至對於您的社會及經濟方面造成影響，**長庚醫療財團法人人體試驗倫理委員會就是要去確保這些風險帶來的傷害已經盡力降到最小。**除了風險，我們也會去評估參與研究者從研究中預期得到的好處、這項研究可能會治癒疾病、可能不會痊癒疾病但可能改善受試者的生活品質、或對參加的人可能不會有好處，但對醫學研究的進步或對未來患有相同疾病的人發現新的治療方式而有所貢獻。長庚醫療財團法人人體試驗倫理委員會將**綜合評估每個研究計畫的風險相對於獲得的好處是不合理，以決定是否通過該計畫**，風險大而對受試者或科學知識沒有任何好處的研究，將不會通過人體試驗倫理委員會的審查。
- (4) 研究計畫通過後，長庚醫療財團法人人體試驗倫理委員會與執行機構(長庚醫院/長庚大學/長庚科技大學)，會針對通過的計畫持續監督，以確定研究團隊確實按照通過的計畫書妥善執行，為受試者的權益把關。

● **做為一位受試者您的權利是什麼？**

✓ **知的權利**

(1) **了解研究的目的是什麼？**

研究人員應該以通俗易懂的話，告訴您這個研究的目的是什麼。

(2) **研究過程將發生什麼事？**

也就是您需要知道這個研究的程序該如何進行，包含：研究過程要您身上做哪些事？該怎麼配合？(例如隔多久要回診一次？每次要抽多少血？做什麼檢查？)，會帶給生活多少不便？

(3) **不參加研究有沒有其他治療方法？**

研究不是一定要參加，因此您有權知道是否還有其他治療方法。

(4) **可能會發生什麼不良反應或風險？**

任何研究一定有風險，因此需知道參加此研究的危險性有多大？同時，也務必了解萬一發生危險或緊急狀況時，該怎麼辦？和誰聯絡？如何聯絡？以及誰會提供後續醫療救治？還有相關費用問題。在加入研究前，研究人員都應仔細向您說明。

(5) **參與研究可能帶來什麼好處與試驗預期的成果？**

研究人員有義務向您說明，這個研究可能對您帶來的好處，或者這個研究可能不會直接對您受益，但研究成果可能會發現新的治療方式對醫學進步、未來的人類有所貢獻，以便提供您考慮是否加入此研究。

(6) **如果您想退出研究計畫，該如何提出？**

研究人員應該告訴您，若您參加研究後中途想退出，應該向誰提出？退出後有無照護計畫？退出研究後，您在參與期間所提供的資料是否繼續分析或保存？

(7) **當您有任何疑慮時，隨時可以向研究人員詢問**

✓ **自由選擇參加研究的權利**

在研究人員向您充分解釋研究目的、研究進程序、其他可能的替代治療、參加研究可能遭遇的風險與帶來的好處、研究的預期成果、退出試驗計畫的程序以及退出後的照護計畫後，經過您自主且有足夠時間的考慮是否參加此研究，並且簽署受試者同意書，您才算正式加入研究，成為受試者。

此外，如果您想要退出研究，您可以於任何時間點，不需要任何的理由，向研究的相關人員提出。而您退出的

|                   |
|-------------------|
| 人體試驗倫理委員會<br>核准日期 |
| 110.5.28          |
| 長庚醫療財團法人          |

決定，也不會影響您後續接受醫療照護的權益或者遭受任何不公平的待遇。

✓ **被保護的權利**

**(1) 隱私與機密的保護**

對於您於參與研究期間所提供的任何資訊，研究團隊人員有義務維護您的隱私，如果發表研究成果，或為確保研究過程與數據符合相關法律及法規要求，人體試驗倫理委員會或主管機關(例如：衛生福利部)將會檢閱研究之相關資訊，但您的身分仍將被保密。

**(2) 保有您現在所擁有的合法權利** 參與臨床研究時，並不會放棄您的任何合法的權利。

|                   |
|-------------------|
| 人體試驗倫理委員會<br>核准日期 |
| 110.5.28          |
| 長庚醫療財團法人          |

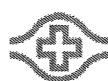

邱立忠

長庚醫療財團法人林口/基隆長庚紀念醫院/土城醫院  
受試者同意書

一、計畫名稱：

胺基酸及生物胺代謝在急性呼吸窘迫症候群的前瞻性多中心研究及發展新的預後模型和治療

二、研究基本資料

病歷號碼：\_\_\_\_\_

1.計畫編號：

IRB 案號/申請編號：

2.試驗機構：林口長庚紀念醫院 基隆長庚紀念醫院 新北市立土城醫院

3.執行者所屬單位：林口長庚紀念醫院 基隆長庚紀念醫院 新北市立土城醫院

4.委託單位/廠商：無

5.主持人：邱立忠

服務單位：長庚紀念醫院 胸腔內科

職稱：助理教授級主治醫師

電話：03-3281200 分機 8467

共同主持人：黃聰龍

服務單位：長庚大學 天然藥物研究所

職稱：教授

電話：03-2118800 轉 5523

共同主持人：鄭美玲

服務單位：長庚大學 生物醫學系

職稱：教授

電話：03-2118800 轉 3811

協同主持人：林恕民

服務單位：長庚紀念醫院 胸腔內科

職稱：副教授級主治醫師

電話：03-3281200 分機 8470

協同主持人：高國晉

服務單位：長庚紀念醫院 胸腔內科

職稱：教授級主治醫師

電話：03-3281200 分機 8467

協同主持人：鐘福財

服務單位：新北市立土城醫院 胸腔內科

職稱：副教授級主治醫師

電話：02-22630588 分機 6189

協同主持人：吳黃平

服務單位：長庚紀念醫院 胸腔內科

職稱：副教授級主治醫師

電話：02-24313131 分機 6260

受試者緊急聯絡電話：林口院區 邱立忠醫師 0975366109

基隆院區 吳黃平醫師 0975360627

新北市土城醫院 鍾福財醫師 0975368085

6.受試者姓名：

受試者研究編號：

性別：

出生日期：

通訊地址：

聯絡電話：

三、簡介：

您好，我們敬邀您參加一個經由長庚醫院審核並通過關於胺基酸及生物胺代謝在急性呼吸窘迫症候群和加護病房病患的計畫。依衛生主管機關規定，您必須被告知接受檢驗及可能的風險。在您同意參加本研究之前，請您再次徹底閱讀這份受試者同意書，並且問清楚任何問題。您可自由決定是否參與本試驗，如果您不同意參加本試驗，您原有的權益亦不會受到任何影響。

四、研究目的：

急性呼吸窘迫症候群是一個血氧濃度低需要使用呼吸器來維持生命的症候群，死亡率接近五成，

人體試驗倫理委員會  
核准日期

110.5.28

長庚醫療財團法人

多數病人的死因為多重器官衰竭。此症候群致病機轉複雜，除了呼吸器良好支持外，目前尚無藥物可以阻斷疾病進展和改善存活率。患者的氧化壓力高，會誘發一連串發炎反應，嗜中性白血球增加，細胞激素釋放，粒線體功能異常，造成更進一步的肺損傷和器官衰竭。胺基酸及生物胺異常代謝會造成進一步發炎反應，免疫系統活化，活性氧物質，氧化壓力增加及粒腺體功能異常。本研究主要目的是探討胺基酸及生物胺代謝，嗜中性白血球及相關發炎反應細胞，和相關細胞激素在急性呼吸窘迫症候群病患的表現與臨床預後的相關性。此計畫同時也會收集非急性呼吸窘迫症候群的加護病房病患及正常健康人，探討這些生物指標是否也會造成後續發展為急性呼吸窘迫症候群和影響預後死亡的危險因子，並和急性呼吸窘迫症候群病患比較相對應的生物和臨床指標。

#### 五、納入/排除條件：

一、如果您符合下列的納入/排除條件才有資格參與本試驗

##### 1. 納入標準

- (1) 年齡大於或等於 20 歲以上之成人
- (2) 符合下列其中一項者
  - a. 臨床上診斷為急性呼吸窘迫症候群的受試者 (實驗組)
  - b. 非急性呼吸窘迫症候群的加護病房受試者 (對照組)
  - c. 正常健康受試者(對照組)
- (3) 受試者本人或代理人簽署受試者同意書

##### 2. 排除條件

- (1) 懷孕
- (2) 後天免疫缺乏症候群
- (3) 末期癌症
- (4) 嚴重內科疾病患者併多重器官衰竭
- (5) 不願意簽署受試者同意書者

#### 六、試驗方法與程序說明：

本研究會於門診招募健康受試者、加護病房招募急性與非急性呼吸窘迫症候群受試者，健康受試者、急性與非急性呼吸窘迫症候群受試者或其法定代理人，經由醫師說明該計畫相關內容及注意事項，簽署同意書後，在急性呼吸窘迫症候群確診的第一天，第三天和第七天會採集受試者約 20 cc 血液檢體及約 10 cc 尿液檢體，確診第一天會施行支氣管鏡檢查取得肺泡沖洗液檢體。非急性呼吸窘迫症候群受試者，則於收案第一天，第三天和第七天會採集約 20 cc 血液檢體及約 10 cc 尿液檢體。和加護病房受試者年紀相符的正常健康人採集約 20 cc 血液檢體。以上檢體會進行胺基酸及生物胺相關代謝體分析，細胞實驗和細胞激素等分析。支氣管鏡檢查並非是急性呼吸窘迫症候群受試者必要之檢查，藉由支氣管鏡檢查取得肺泡沖洗液檢體，可以更加了解肺部相關生物指標和不明原因肺炎時致病菌或病毒之確認，對於診斷和治療會有所幫助。支氣管鏡檢查可能的併發症有呼吸道痙攣、咳血、氣胸、低血氧、發燒、菌血症、心律不整等，在加護病房做檢查，會有生命徵象監測儀持續監控，發生嚴重併發症的機會很低，若病人有發生危急生命的表徵出現時，我們會立即停止檢查。若受試者或法定代理人對於支氣管鏡檢查風險仍有所顧慮而不同意時，我們不會執行支氣管鏡檢查。

#### 七、可預期之風險、副作用、發生率及處理方法：

抽血可能的風險有血腫、皮下出血、靜脈炎等，我們會注意及觀察受試者在抽血過程後的反應。若有不適和相關的不良反應，我們會停止抽血的動作，並有醫護人員立即處置。本實驗為一觀察型研究，不干涉或是影響您的主治醫師臨床專業判斷或是醫療處置，對於正在治療的藥物和臨床處置

試驗倫理委員會  
核准日期  
2021.05.28  
長庚醫療財團法人

並無影響。本計畫為評估受試者的胺基酸及生物胺相關代謝體分析，細胞實驗和細胞激素狀況，和基因不同，不會有個人隱私的問題。檢體在送檢編碼後，即會將個人資料去連結。本計畫會嚴守相關規定，防止相關個人隱私資料外洩。每次抽血將配合病患原定抽血時間，若於血液採檢時有發生嚴重副作用時，請通知緊急聯絡人。

八、其他可能之治療方式及說明：

此研究為收集檢體，不影響例行常規的診斷與治療方式。

九、本試驗之禁忌與限制，請您務必充分配合之事項：

符合本計畫的研究對象病患需在計畫收案開始當天、第三天和第七天，接受靜脈抽血及尿液採檢。急性呼吸窘迫症候群病患在第一天需接受支氣管鏡檢查。

十、預期試驗效果：

您參加本研究未必會對您本人帶來好處，期望本研究利用胺基酸及生物胺相關代謝體分析，細胞實驗及細胞激素分析可以找出適當的生物指標，提供進一步致病機轉和藥物治療相關應用，對未來病人處置可能會有所助益。

十一、緊急狀況之處理：

若您參與本研究發生任何不適或其他緊急狀況，您可聯絡本計畫主持人邱立忠醫師，24小時緊急連絡電話為 0975366109。

十二、補助、費用負擔與損害補償：

1.補助：無。

2.費用負擔：無。

3.損害補償：

(1)如依本研究所訂研究計畫，因而發生不良反應造成損害，由本院與試驗主持人依法負補償責任。但本受試者同意書上所記載之可預期不良反應，不予補償。

(2)如依本研究所訂研究計畫，因而發生不良反應或損害，本院願意提供專業醫療照顧及醫療諮詢。您不必負擔治療不良反應或傷害之必要醫療費用。

(3)除前二項補償及醫療照顧外，本研究不提供其他形式之補償。若您不願意接受這樣的風險，請勿參加試驗/研究。

(4)您不會因為簽署本同意書，而喪失在法律上的任何權利。

十三、保護隱私與機密性：

1.將會有一個研究代碼代表您的身分，此代碼不會顯示您的姓名、身分證字號、住址。

2.對於您訪查的結果及診斷，研究主持人將持保密的態度，小心維護您的隱私。如果發表研究結果，您的身分仍將保密。

3.請您亦瞭解若簽署同意書即同意您的訪查紀錄可直接受監測者、稽核者、研究倫理委員會及主管機關檢閱，以確保本研究過程與數據符合相關法律及法規要求。上述人員並承諾絕不違反您的身分之機密性。

4.請您瞭解基於安全考量，研究團隊可能會告知或聯繫您的其他科別主治醫師，使其了解您參與的試驗及疾病治療狀況，以避免藥物交互作用造成危害。

十四、試驗之退出與中止：

受試者或立同意書人有權在無任何理由情況下，隨時要求終止參與試驗，此將不會減損您的正當醫療權益與法律權利。試驗主持人或贊助廠商亦可能於必要時中止該試驗之進行。

十五、受試者權利：

1.對於您個人資料之蒐集、處理及利用，試驗機構/試驗主持人將依受試者同意書、臨床試驗相關法

人體試驗倫理委員會  
核准日期

110.5.28

長庚醫療財團法人

規及個人資料保護法相關規定辦理。您可以依據個人資料保護法之規定，以書面連絡試驗機構/試驗主持人而行使下列權利：

- (1)查詢或請求閱覽您的個人資料；
- (2)請求提供您個人資料的影印本；
- (3)請求補充或更正您的個人資料；
- (4)請求停止蒐集、處理或利用您的個人資料；
- (5)請求刪除您的個人資料。

2.研究過程中，凡可能影響您繼續接受臨床試驗意願的任何重大發現，都將及時提供給您。研究過程中如有任何的問題或狀況，請與主持人聯繫。

3.對身為受試者之權利有意見或懷疑因參與研究而受害時，可與本院之人體試驗倫理委員會聯絡請求諮詢，其電話號碼為：(03)319-6200 轉 3707、3703、3705~3709、3711~3714、3716~3717。

十六、試驗成果及權益歸屬：

如本試驗計畫成果產生學術文獻發表、實質效益或衍生其他權益時，亦同意無償捐贈給本院作為疾病預防、診斷及治療等公益用途。

十七、個人資料、檢體與檢體衍生物之保存與再利用：

檢體將存放於胸腔內科實驗室，邱立忠醫師為檢體保管負責人。若有剩餘檢體將於計畫結束後保存於胸腔內科實驗室一年，之後統一將檢體銷毀。

十八、聲明：

1. 本計畫內容及同意書已經\_\_\_\_\_完整口頭告知及說明，受試者本人/法定代理人已充分瞭解並同意，本同意書一式二份，已將研究用受試者同意書之副本交給受試者。
2. 本研究計畫在加護病房收案，由法定代理人同意之受試者，若受試者可自行行使同意時，會補徵得其本人之同意。

A.受試者：\_\_\_\_\_ (正楷姓名)

\_\_\_\_\_ (簽名)

日期：\_\_\_\_年\_\_\_\_月\_\_\_\_日

B.取得同意書人：\_\_\_\_\_ (正楷姓名)

\_\_\_\_\_ (簽名)

日期：\_\_\_\_年\_\_\_\_月\_\_\_\_日

C.共/協同主持人：\_\_\_\_\_ (正楷姓名)

\_\_\_\_\_ (簽名)

日期：\_\_\_\_年\_\_\_\_月\_\_\_\_日

D.研究主持人：\_\_\_\_\_ (正楷姓名)

\_\_\_\_\_ (簽名)

日期：\_\_\_\_年\_\_\_\_月\_\_\_\_日

\*\*收案對象符合【同意書簽署說明】第(一)項時，此欄位必須簽名\*\*

人體試驗倫理委員會  
核准日期

110.5.28

長庚醫療財團法人

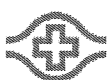

長庚醫療財團法人  
CHANG GUNG MEDICAL FOUNDATION

頁 4 之 6

版本日期

【2021/05/26 第三版】

E.法定代理人/有同意權人/監護人/輔助人：\_\_\_\_\_ (正楷姓名)

\_\_\_\_\_ (簽名) 日期：\_\_\_\_年\_\_\_\_月\_\_\_\_日

與受試者之關係：\_\_\_\_\_

\*\*收案對象符合【同意書簽署說明】第(二)項時，此欄位必須簽名\*\*

F.見證人：\_\_\_\_\_ (正楷姓名)

\_\_\_\_\_ (簽名) 日期：\_\_\_\_年\_\_\_\_月\_\_\_\_日

**【同意書簽署說明】**

**(一)法定代理人/有同意權人/監護人/輔助人使用時機：**

\*醫療法第79條/人體研究法第12條/藥品優良臨床試驗準則第五條：

- 1.受試者為無行為能力(未滿七歲之未成年人或受監護宣告之人)，由法定代理人為之；受監護宣告之人，由監護人擔任其法定代理人。
- 2.受試者為限制行為能力者(滿七歲以上之未成年人或受輔助宣告之人)，應得其本人及法定代理人或輔助人之同意。
- 3.受試者雖非無行為能力或限制行為能力者，但因意識混亂或有精神與智能障礙，而無法進行有效溝通和判斷時，由有同意權之人為之。

**(二)見證人使用時機：**

\*藥品優良臨床試驗準則第二十一條：

- 1.受試者、法定代理人或有同意權人皆無法閱讀時，應由見證人在場參與所有有關受試者同意書之討論。見證人應閱讀受試者同意書及提供受試者之任何其他書面資料，以見證研究主持人或其指定之人員已經確切地將其內容向受試者、法定代理人或有同意權之人解釋，並確定其充分了解所有資料之內容。
- 2.受試者、法定代理人或有同意權人，仍應於受試者同意書親筆簽名並載明日期。但得以指印代替簽名。
- 3.見證人於完成口述說明，並確定受試者、法定代理人或有同意權人之同意完全出於其自由意願後，應於受試者同意書簽名並載明日期。
- 4.研究相關人員不得為見證人。

**(三)法定代理人簽署順序：**

\*依據醫療法第七十九條：醫療機構施行人體試驗時，應善盡醫療上必要之注意，並應先取得接受試驗者之書面同意；接受試驗者以有意思能力之成年人為限。但顯有益於特定人口群或特殊疾病罹患者健康權益之試驗，不在此限。

\*依據人體試驗管理辦法第五條：依據醫療法第七十九條第一項但書招募之成年或已結婚未成年之受試者，主持人應依下列順序取得其關係人至少一人之同意：

- 一、 配偶。
- 二、 父母。
- 三、 同居之成年子女。
- 四、 與受試者同居之祖父母。
- 五、 與受試者同居之兄弟姊妹。
- 六、 最近一年有同居事實之其他親屬。

前項第一款至第五款關係人之同意，以有同居事實者優先。

第一項關係人之同意，不得違反受試者曾表示之意思。

**【長庚醫療財團法人長庚紀念醫院/長庚大學/長庚科技大學 研究參與者需知】**

親愛的受試者、家屬、民眾，您好：

在您符合試驗或研究之納入條件時，您可能被邀請參與長庚醫院/長庚大學/長庚科技大學的研究計畫，為了保障您參與研究的安全與權益，以下內容將向您說明長庚醫療財團法人人體試驗倫理委員會所做的努力與把關，包含：

人體試驗倫理委員會  
核准日期

2020.5.28

長庚醫療財團法人

計畫如何審查、審查的重點為何以及受試者的權利。

● **什麼是研究？**

「研究」和「治療」是不一樣的。「治療」是已經歷經研究過程，完全了解治療以後可能發生的結果及副作用的發生機率。但「研究」是為了解答我們原來所不知道的知識，並不完全清楚會發生怎樣的結果。因此，**研究不是一定要參加，且不參加不會影響您後續接受醫療照護的權益或者遭受任何不公平的待遇。**

● **什麼是人體試驗倫理委員會？**

「人體試驗倫理委員會(Institutional Review Board, 簡稱IRB)」是為確保人體試驗或研究符合科學與倫理適當性，所設立的審查單位。由具專業知識的醫療人員，及法律專家、社會公正人士或民間團體代表等非醫學背景人士組成，協助研究人員了解受試者的處境，以確保受試者的安全與權益。**受試者對參與研究之相關權益有任何問題時，都可向長庚醫療財團法人人體試驗倫理委員會詢問。**

● **人體試驗倫理委員會如何審查臨床試驗/研究計畫？審查的重點為何？**

- (1) 在長庚醫院/長庚大學/長庚科技大學執行的研究，都需要經過長庚醫療財團法人人體試驗倫理委員會的審查，通過了才可執行。
- (2) 送到人體試驗倫理委員會的研究計畫，都會經過委員或者專家，以獨立、專業且謹慎的態度進行審查，審查的重點，包含：是否有詳盡告知受試者試驗相關的事宜(包含：試驗目的、試驗進程序等)、其他可能替代的治療方式、參與研究的副作用、風險及好處、如何退出研究、參加者的照護與隱私是否受到保護等。
- (3) 在進行臨床研究審查時，長庚醫療財團法人人體試驗倫理委員會將評估這些研究計畫對於參與研究者可能造成的風險有哪些？有些風險是屬於身體上的疼痛、不適，有些則帶來心理上的不舒服，有些甚至對於您的社會及經濟方面造成影響，**長庚醫療財團法人人體試驗倫理委員會就是要去確保這些風險帶來的傷害已經盡力降到最小。**除了風險，我們也會去評估參與研究者從研究中預期得到的好處、這項研究可能會治癒疾病、可能不會痊癒疾病但可能改善受試者的生活品質、或對參加的人可能不會有好處，但對醫學研究的進步或對未來患有相同疾病的人發現新的治療方式而有所貢獻。長庚醫療財團法人人體試驗倫理委員會將**綜合評估每個研究計畫的風險相對於獲得的好處是不是合理，以決定是否通過該計畫**，風險大而對受試者或科學知識沒有任何好處的研究，將不會通過人體試驗倫理委員會的審查。
- (4) 研究計畫通過後，長庚醫療財團法人人體試驗倫理委員會與執行機構(長庚醫院/長庚大學/長庚科技大學)，會針對通過的計畫持續監督，以確定研究團隊確實按照通過的計畫書妥善執行，為受試者的權益把關。

● **做為一位受試者您的權利是什麼？**

✓ **知的權利**

(1) **了解研究的目的是什麼？**

研究人員應該以通俗易懂的話，告訴您這個研究的目的是什麼。

(2) **研究過程將發生什麼事？**

也就是您需要知道這個研究的程序該如何進行，包含：研究過程要您身上做哪些事？該怎麼配合？(例如隔多久要回診一次？每次要抽多少血？做什麼檢查？)，會帶給生活多少不便？

(3) **不參加研究有沒有其他治療方法？**

研究不是一定要參加，因此您有權知道是否還有其他治療方法。

(4) **可能會發生什麼不良反應或風險？**

任何研究一定有風險，因此需知道參加此研究的危險性有多大？同時，也務必了解萬一發生危險或緊急狀況時，該怎麼辦？和誰聯絡？如何聯絡？以及誰會提供後續醫療救治？還有相關費用問題。在加入研究前，研究人員都應仔細向您說明。

(5) **參與研究可能帶來什麼好處與試驗預期的成果？**

研究人員有義務向您說明，這個研究可能對您帶來的好處，或者這個研究可能不會直接對您受益，但研究成果可能會發現新的治療方式對醫學進步、未來的人類有所貢獻，以便提供您考慮是否加入此研究。

(6) **如果您想退出研究計畫，該如何提出？**

研究人員應該告訴您，若您參加研究後中途想退出，應該向誰提出？退出後有無照護計畫？退出研究後，您在參與期間所提供的資料是否繼續分析或保存？

(7) **當您有任何疑慮時，隨時可以向研究人員詢問**

✓ **自由選擇參加研究的權利**

在研究人員向您充分解釋研究目的、研究進程序、其他可能的替代治療、參加研究可能遭遇的風險與帶來的好處、研究的預期成果、退出試驗計畫的程序以及退出後的照護計畫後，經過您自主且有足夠時間的考慮是否參加此研究，並且簽署受試者同意書，您才算正式加入研究，成為受試者。

此外，如果您想要退出研究，您可以於任何時間點，不需要任何的理由，向研究的相關人員提出。而您退出的

決定，也不會影響您後續接受醫療照護的權益或者遭受任何不公平的待遇。

✓ **被保護的權利**

**(1) 隱私與機密的保護**

對於您於參與研究期間所提供的任何資訊，研究團隊人員有義務維護您的隱私，如果發表研究成果，或為確保研究過程與數據符合相關法律及法規要求，人體試驗倫理委員會或主管機關(例如：衛生福利部)將會檢閱研究之相關資訊，但您的身分仍將被保密。

**(2) 保有您現在所擁有的合法權利** 參與臨床研究時，並不會放棄您的任何合法的權利。

人體試驗倫理委員會  
核准日期

110.5.28

長庚醫療財團法人

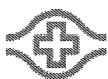

長庚醫療財團法人  
CHANG GUNG MEDICAL FOUNDATION

頁 7 之 6

版本日期

【2021/05/26 第三版】
